# Supplementary material
Source: PubMed Central journal article supplement (PMC10184463)
Supplement: NIHMS1885844-supplement-Supplemental_information.pdf [file NIHMS1885844-supplement-Supplemental_information.pdf]

## Accelerated RNA detection using tandem CRISPR nucleases

Tina Y. Liu<sup>1,2</sup>, Gavin J. Knott<sup>1-3</sup>, Dylan C. J. Smock<sup>1,2</sup>, John J. Desmarais<sup>1</sup>, Sungmin Son<sup>4</sup>, Abdul Bhuiya<sup>4,5</sup>, Shrutee Jakhanwal<sup>1,2</sup>, Noam Prywes<sup>2</sup>, Shreeya Agrawal<sup>2,4</sup>, María Díaz de León Derby<sup>4,5</sup>, Neil A. Switz<sup>7</sup>, Maxim Armstrong<sup>4,8</sup>, Andrew R. Harris<sup>4</sup>, Emeric J. Charles<sup>1</sup>, Brittney W. Thornton<sup>1</sup>, Parinaz Fozouni<sup>9-12</sup>, Jeffrey Shu<sup>9,12</sup>, Stephanie I. Stephens<sup>9,12</sup>, G. Renuka Kumar<sup>9,12</sup>, Chunyu Zhao<sup>9,13</sup>, Amanda Mok<sup>14</sup>, Anthony T. Iavarone<sup>15</sup>, Arturo M. Escajeda<sup>16</sup>, Roger McIntosh<sup>16</sup>, Shin E. Kim<sup>1,2</sup>, Eli J. Dugan<sup>1,2</sup>, IGI Testing Consortium<sup>2</sup>, Katherine S. Pollard<sup>9,13,17</sup>, Ming X. Tan<sup>16</sup>, Melanie Ott<sup>9,12</sup>, Daniel A. Fletcher<sup>4,5,13</sup>, Liana F. Lareau<sup>2,4</sup>, Patrick D. Hsu<sup>2,4</sup>, David F. Savage<sup>2,4</sup>, Jennifer A. Doudna<sup>1,2,8,9,18-21</sup>

<sup>1</sup>Department of Molecular and Cell Biology, University of California, Berkeley, CA, USA

<sup>2</sup>Innovative Genomics Institute, University of California, Berkeley, Berkeley, CA, USA

<sup>3</sup>Monash Biomedicine Discovery Institute, Department of Biochemistry & Molecular Biology, Monash University, VIC 3800, Australia

<sup>4</sup>Department of Bioengineering, University of California, Berkeley, CA, USA

<sup>5</sup>UC Berkeley-UC San Francisco Graduate Program in Bioengineering, University of California, Berkeley, Berkeley, CA, USA

<sup>6</sup>Division of Biological Systems and Engineering, Lawrence Berkeley National Laboratory, Berkeley, CA, USA

<sup>7</sup>Department of Physics and Astronomy, San José State University, San José, CA, USA

<sup>8</sup>Molecular Biophysics and Integrated Bioimaging Division, Lawrence Berkeley National Laboratory, Berkeley, CA, USA

<sup>9</sup>Gladstone Institute of Virology, Gladstone Institutes, San Francisco, CA, USA.

<sup>10</sup>Medical Scientist Training Program, University of California, San Francisco, San Francisco, CA 94143, USA

<sup>11</sup>Biomedical Sciences Graduate Program, University of California, San Francisco, San Francisco, CA 94143, USA

<sup>12</sup>Department of Medicine, University of California, San Francisco, San Francisco, CA 94143, USA

<sup>13</sup>Chan-Zuckerberg Biohub, San Francisco, CA, USA

<sup>14</sup>Center for Computational Biology, University of California, Berkeley, Berkeley, CA, USA;

<sup>15</sup>QB3/Chemistry Mass Spectrometry Facility, University of California, Berkeley, Berkeley, CA, USA

<sup>16</sup>Wainamics Inc., Pleasanton, CA, USA

<sup>17</sup>Department of Epidemiology & Biostatistics, University of California, San Francisco, CA, USA

<sup>18</sup>Howard Hughes Medical Institute, University of California, Berkeley, Berkeley, CA, USA

<sup>19</sup>Department of Chemistry, University of California, Berkeley, Berkeley, CA, USA

<sup>20</sup>Gladstone Institute of Data Science and Biotechnology, Gladstone Institutes, San Francisco, CA, USA

<sup>21</sup>California Institute for Quantitative Biosciences (QB3), University of California, Berkeley, Berkeley, CA, USA.

\*Correspondence to: [doudna@berkeley.edu](mailto:doudna@berkeley.edu)

## Supplementary Information

### 1 Chemical equations for cas13 to csm6 transduction model

#### 1.1 cas13 on target activity

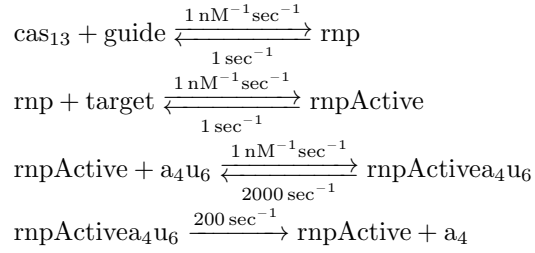

#### 1.2 cas13 background activity

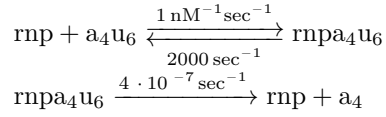

#### 1.3 csm6 activity

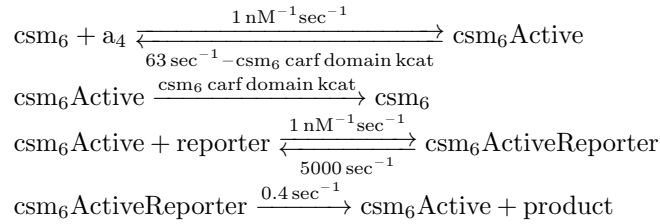

## 2 cas13 to csm6 transduction model

### 2.1 Ordinary differential equations for component concentrations

$$\begin{aligned} c'_{a4}(t) &= -c_{a4}(t)c_{csm6}(t) + (63 - csm6 \text{ Carf domain kcat}) \\ &\quad c_{csm6Active}(t) + \frac{c_{rnpa4u6}(t)}{2500000} + 200c_{rnpActivea4u6}(t), \end{aligned}$$

$$\begin{aligned} c'_{a4u6}(t) &= -c_{a4u6}(t)c_{rnp}(t) - c_{a4u6}(t)c_{rnpActive}(t) + \\ &\quad 2000c_{rnpa4u6}(t) + 2000c_{rnpActivea4u6}(t), \end{aligned}$$

$$c'_{cas13}(t) = c_{rnp}(t) - c_{cas13}(t)c_{guide}(t),$$

$$\begin{aligned} c'_{csm6}(t) &= -c_{a4}(t)c_{csm6}(t) + \\ &\quad (63 - csm6 \text{ Carf domain kcat})c_{csm6Active}(t) + \\ &\quad csm6 \text{ Carf domain kcat}c_{csm6Active}(t), \end{aligned}$$

$$\begin{aligned} c'_{csm6Active}(t) &= c_{a4}(t)c_{csm6}(t) - (63 - csm6 \text{ Carf domain kcat})c_{csm6Active}(t) - \\ &\quad csm6 \text{ Carf domain kcat}c_{csm6Active}(t) - c_{csm6Active}(t) \\ &\quad c_{reporter}(t) + 5000.4c_{csm6ActiveReporter}(t), \end{aligned}$$

$$c'_{csm6ActiveReporter}(t) = c_{csm6Active}(t)c_{reporter}(t) - 5000.4c_{csm6ActiveReporter}(t),$$

$$c'_{guide}(t) = c_{rnp}(t) - c_{cas13}(t)c_{guide}(t),$$

$$c'_{product}(t) = 0.4c_{csm6ActiveReporter}(t),$$

$$c'_{reporter}(t) = 5000c_{csm6ActiveReporter}(t) - c_{csm6Active}(t)c_{reporter}(t),$$

$$\begin{aligned} c'_{rnp}(t) &= -c_{a4u6}(t)c_{rnp}(t) + c_{cas13}(t)c_{guide}(t) - c_{rnp}(t)c_{target}(t) - \\ &\quad c_{rnp}(t) + \frac{5000000001c_{rnpa4u6}(t)}{2500000} + c_{rnpActive}(t), \end{aligned}$$

$$c'_{rnpa4u6}(t) = c_{a4u6}(t)c_{rnp}(t) - \frac{5000000001c_{rnpa4u6}(t)}{2500000},$$

$$c'_{rnpActive}(t) = -c_{a4u6}(t)c_{rnpActive}(t) + c_{rnp}(t)c_{target}(t) - c_{rnpActive}(t) + 2200c_{rnpActivea4u6}(t),$$

$$c'_{rnpActivea4u6}(t) = c_{a4u6}(t)c_{rnpActive}(t) - 2200c_{rnpActivea4u6}(t),$$

$$c'_{target}(t) = c_{rnpActive}(t) - c_{rnp}(t)c_{target}(t),$$

### 2.2 Starting concentrations of components

$$\begin{array}{lll} c_{a4}(0) = 0nM & c_{csm6}(0) = 100nM & c_{guide}(0) = 13.5078nM \\ c_{a4u6}(0) = 2000nM & c_{csm6Active}(0) = 0nM & c_{product}(0) = 0nM \\ c_{cas13}(0) = 13.5078nM & c_{csm6ActiveReporter}(0) = 0nM & c_{rnp}(0) = 36.4922nM \\ c_{rnpa4u6}(0) = 0nM & c_{rnpActive}(0) = 0nM & c_{rnpActivea4u6}(0) = 0nM \\ c_{target}(0) = target & & \end{array}$$
